# Supplementary material for: Feasibility of point-of-care cardiac ultrasound performed by clinicians at health centers in Tanzania
Source: Springer Nature journal article supplement (doi:10.1186/s12872-021-02045-y), 2021-05-12
Supplement: MOESM1 [file 19158002]

**VScan: Pre-Training Knowledge Assessment: Multiple Choice**

| <b>Pre-Training Knowledge Assessment: Multiple Choice</b>                                                                                                 |                                                                                                                                                                                                                       |
|-----------------------------------------------------------------------------------------------------------------------------------------------------------|-----------------------------------------------------------------------------------------------------------------------------------------------------------------------------------------------------------------------|
| The following assessment is multiple choice.<br>For each question, please select <b>one</b> best response.<br>Please indicate your selection with an "x." |                                                                                                                                                                                                                       |
| 1. The normal human heart has how many chambers?                                                                                                          | <input type="checkbox"/> One<br><input type="checkbox"/> Two<br><input type="checkbox"/> Three<br><input type="checkbox"/> Four                                                                                       |
| 2. In the normal human heart, which cardiac chamber is largest and has the thickest walls?                                                                | <input type="checkbox"/> Right ventricle<br><input type="checkbox"/> Left ventricle<br><input type="checkbox"/> Right atrium<br><input type="checkbox"/> Left atrium                                                  |
| 3. The left atrium receives blood from which of the following structures?                                                                                 | <input type="checkbox"/> Aorta<br><input type="checkbox"/> Pulmonary veins<br><input type="checkbox"/> Right atrium<br><input type="checkbox"/> Left atrium                                                           |
| 4. What is the name of the valve that separates the left atrium from the left ventricle?                                                                  | <input type="checkbox"/> Aortic valve<br><input type="checkbox"/> Pulmonic valve<br><input type="checkbox"/> Mitral valve<br><input type="checkbox"/> Tricuspid valve                                                 |
| 5. The left ventricle pumps blood into what structure?                                                                                                    | <input type="checkbox"/> Aorta<br><input type="checkbox"/> Pulmonary Veins<br><input type="checkbox"/> Right atrium<br><input type="checkbox"/> Right ventricle                                                       |
| 6. The right atrium receives blood from which of the following structures?                                                                                | <input type="checkbox"/> Aorta<br><input type="checkbox"/> Pulmonary veins<br><input type="checkbox"/> Right atrium<br><input type="checkbox"/> Superior and inferior vena cava                                       |
| 7. What is the name of the valve that separates the right atrium from the right ventricle?                                                                | <input type="checkbox"/> Aortic valve<br><input type="checkbox"/> Pulmonic Valve<br><input type="checkbox"/> Mitral Valve<br><input type="checkbox"/> Tricuspid Valve                                                 |
| 8. What is the normal wall thickness for the inter-ventricular septum and posterior LV wall?                                                              | <input type="checkbox"/> 2 to 5 mm<br><input type="checkbox"/> 6 to 12 mm<br><input type="checkbox"/> 14 to 17 mm                                                                                                     |
| 9. When associated with pericardial effusion, collapse of the right atrium and right ventricle during diastole can be an indication of:                   | <input type="checkbox"/> Left ventricular hypertrophy<br><input type="checkbox"/> Cardiac tamponade<br><input type="checkbox"/> Severe aortic valve stenosis<br><input type="checkbox"/> Severe mitral valve stenosis |
| 10. What is the normal left ventricular ejection fraction?                                                                                                | <input type="checkbox"/> 10 to 20%<br><input type="checkbox"/> 30 to 44%<br><input type="checkbox"/> ≥ 55%                                                                                                            |
