# Supplementary material for: Feasibility of point-of-care cardiac ultrasound performed by clinicians at health centers in Tanzania
Source: Springer Nature journal article supplement (doi:10.1186/s12872-021-02045-y), 2021-05-12
Supplement: MOESM2 [file 19158002]

VScan: Pre-Training Knowledge Assessment: Vignettes

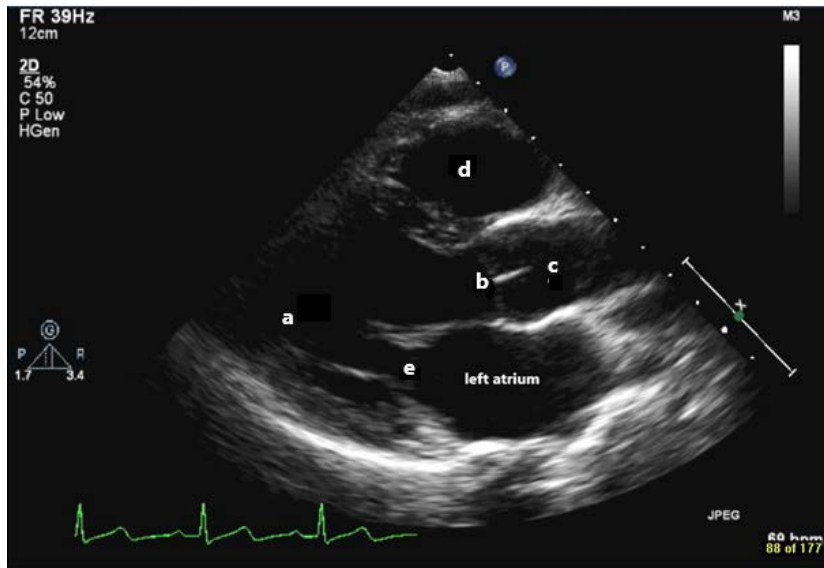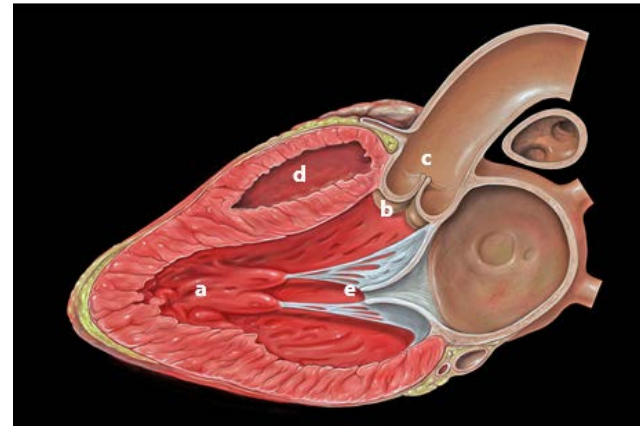

1.) Please identify the structures of the heart labelled in the parasternal long axis view above (left). Please feel free to refer to the drawing of the heart on the right if it is helpful for orientating yourself to the cardiac ultrasound image on the left.

- a.) \_\_\_\_\_
- b.) \_\_\_\_\_
- c.) \_\_\_\_\_
- d.) \_\_\_\_\_
- e.) \_\_\_\_\_

VScan: Pre-Training Knowledge Assessment: Vignettes

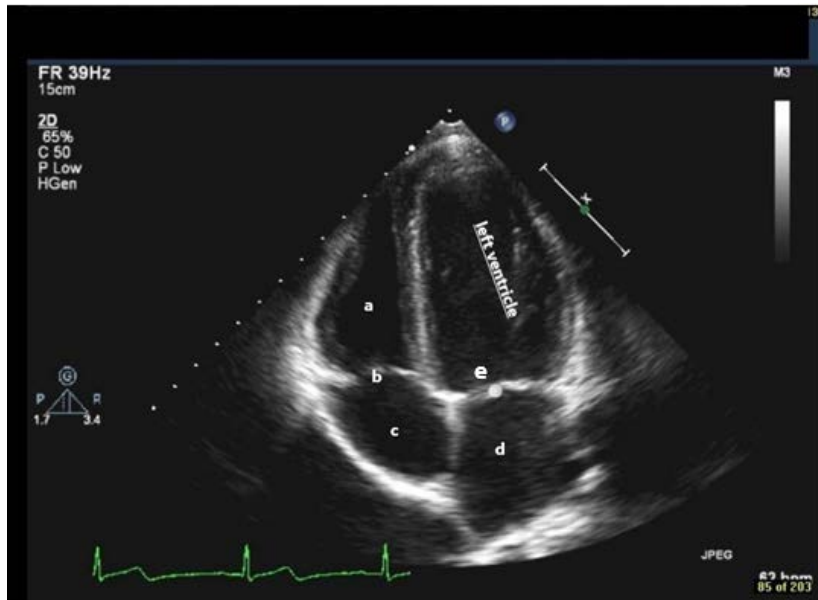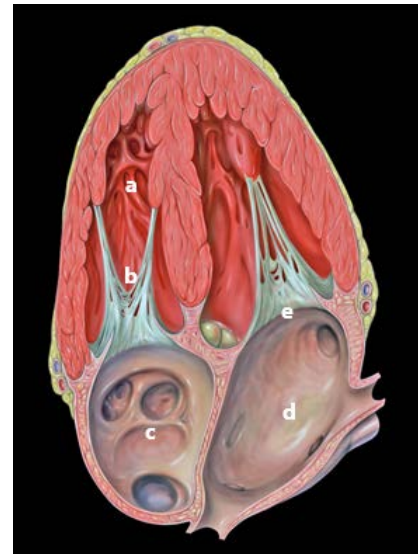

2.) Please identify the structures of the heart labelled in the apical 4 chamber view above (left). Please feel free to refer to the drawing of the heart on the right if it is helpful for orientating yourself to the cardiac ultrasound image on the left.

- a.) \_\_\_\_\_
- b.) \_\_\_\_\_
- c.) \_\_\_\_\_
- d.) \_\_\_\_\_
- e.) \_\_\_\_\_

### VScan: Pre-Training Knowledge Assessment: Vignettes

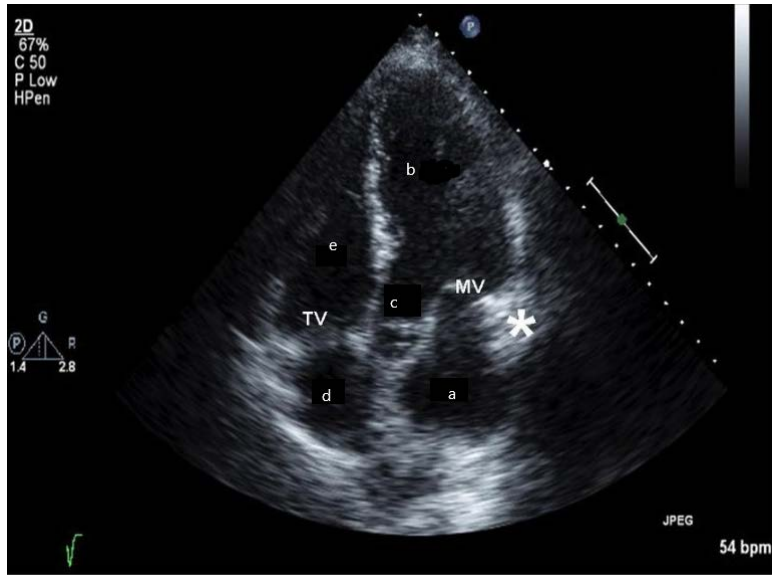

3.) Please identify the structures of the heart labelled in the apical 5 chamber view above.

- a.) \_\_\_\_\_
- b.) \_\_\_\_\_
- c.) \_\_\_\_\_
- d.) \_\_\_\_\_
- e.) \_\_\_\_\_

VScan: Pre-Training Knowledge Assessment: Vignettes

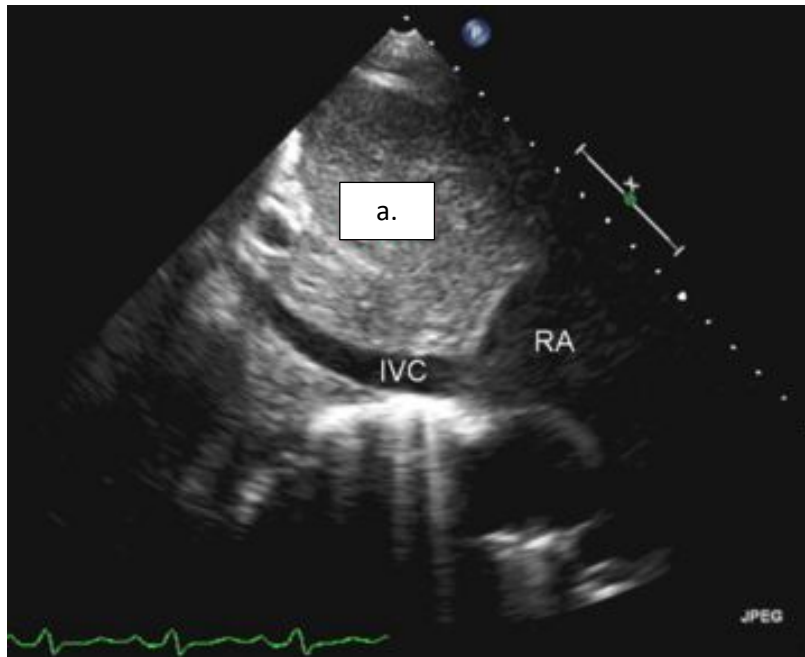

4.) Please label this anatomical landmark of importance in the subcostal (inferior vena cava) view.

a.) \_\_\_\_\_

**VScan: Pre-Training Knowledge Assessment: Vignettes**

*Please refer to the videos on screen for the following 4 questions.*

5.) Please evaluate the left ventricular function in the images on screen. In images a and b, is left ventricular function:

- a.) Normal
- b.) Mildly suppressed
- c.) Severely suppressed

6.) Please evaluate the left ventricular function in the images on screen. In images c and d, is left ventricular function:

- a.) Normal
- b.) Mildly suppressed
- c.) Severely suppressed

7.) In images e and f please assess the presence or absence of mitral regurgitation.

- a.) None – Mild Mitral Regurgitation
- b.) Moderate-Severe Mitral Regurgitation

8.) In images g and h, is the mitral valve stenosis present or absent?

- a) Mitral stenosis present
- b.) Mitral stenosis absent
